# Supplementary material for: An extensive benchmark study on biomedical text generation and mining with ChatGPT
Source: PubMed Central journal article supplement (PMC10562950; doi:10.1093/bioinformatics/btad557), 2023-09-08
Supplement: btad557_supplementary_data.pdf [file btad557_supplementary_data.pdf]

**Table S1.** Performance of ChatGPT on biomedical-NLP tasks with different prompt.

| Dataset  | Prompt                                                                                                                                                                                                                                                                                                                                                                                                                                                                                                                                                                                                                                                                                                                                                                                                                                                                                                                                                                                                                          | Metrics |
|----------|---------------------------------------------------------------------------------------------------------------------------------------------------------------------------------------------------------------------------------------------------------------------------------------------------------------------------------------------------------------------------------------------------------------------------------------------------------------------------------------------------------------------------------------------------------------------------------------------------------------------------------------------------------------------------------------------------------------------------------------------------------------------------------------------------------------------------------------------------------------------------------------------------------------------------------------------------------------------------------------------------------------------------------|---------|
| ChemPort | According to the reference: <text>, What is the relation between ent1 and ent2? Answer with one word within 'activator', 'inhibitor', 'agonist', 'antagonist', 'substrate' or 'None'.                                                                                                                                                                                                                                                                                                                                                                                                                                                                                                                                                                                                                                                                                                                                                                                                                                           | 34.16%  |
|          | According to the reference <text>, what is the relation between the @CHEMICAL\$ and @GENE\$ ignoring what they exactly are? The relation between a chemical and a gene can be ["activator", "inhibitor", "agonist", "antagonist", "substrate", "production"]. Here are some examples: {1 example for each label According to the reference}. Answer in one words within ["activator", "inhibitor", "agonist", "antagonist", "substrate", "production"]. If the relation can not be determined with the reference or they have no relation, answer "False".                                                                                                                                                                                                                                                                                                                                                                                                                                                                      | 48.54%  |
| GAD      | Reference: <text> Dose the reference reflect a relation between the @DISEASE\$ and the @GENE\$ without inferring what the exact disease and gene are? Answer with "yes" or "no".                                                                                                                                                                                                                                                                                                                                                                                                                                                                                                                                                                                                                                                                                                                                                                                                                                                | 47.19%  |
|          | Reference: <text> Dose the reference reflect a relation between the @DISEASE\$ and the @GENE\$ without inferring what the exact disease and gene are? Answer with "yes" or "no".                                                                                                                                                                                                                                                                                                                                                                                                                                                                                                                                                                                                                                                                                                                                                                                                                                                | 52.43%  |
| DDI      | Text: <text> Target: you need to identify the relationship between the two @DRUG\$. Require: you must answer within ['mechanism', 'effect', 'advice', 'int', 'None']                                                                                                                                                                                                                                                                                                                                                                                                                                                                                                                                                                                                                                                                                                                                                                                                                                                            | 45.80%  |
|          | Target: you need to identify the relationship between the two @DRUG\$. Require: you must answer within ['mechanism', 'effect', 'advice', 'int', 'None'] <mechanism>: This type is used to annotate DDIs that are described by their PK mechanism (e.g. Grepafloxacin may inhibit the metabolism of theobromine). <effect>: This type is used to annotate DDIs describing an effect (e.g. In uninfected volunteers, 46% developed rash while receiving SUSTIVA and clarithromycin) or a PD mechanism (e.g. Chlorthalidone may potentiate the action of other antihypertensive drugs). <advice>: This type is used when a recommendation or advice regarding a drug interaction is given (e.g. UROXATRAL should not be used in combination with other alpha-blockers). <int>: This type is used when a DDI appears in the text without providing any additional information (e.g. The interaction of omeprazole and ketoconazole has been established). <none>: The text does not mention the relationship between the two drugs. | 51.62%  |
